# Supplementary material for: A Longitudinal Examination of Real-World Sedentary Behavior in Adults with Schizophrenia-Spectrum Disorders in a Clinical Trial of Combined Oxytocin and Cognitive Behavioral Social Skills Training
Source: MDPI journal article supplement (doi:10.3390/bs12030060), 2022-02-23
Supplement: s1 [file s1]

Table S1. *Sample Demographics of Parent RCT*

|                   | <b>CBSST + Oxytocin (n=31)</b> | <b>CBSST + Placebo (n=31)</b> |
|-------------------|--------------------------------|-------------------------------|
| Age (years)       | 42.8 (8.7)                     | 40.7 (10.2)                   |
| Sex               |                                |                               |
| Male              | 18 (58.0)                      | 20 (64.5)                     |
| Female            | 13 (42.0)                      | 11 (33.5)                     |
| Race              |                                |                               |
| White             | 17 (54.8)                      | 15 (48.4)                     |
| Black             | 9 (29.0)                       | 7 (22.6)                      |
| Other             | 5 (16.1)                       | 7 (22.6)                      |
| Education (years) | 13.0 (1.9)                     | 13.4 (2.3)                    |

*Note.* The present study included the 57/62 participants that completed any EMA surveys.

Table S2. *Time Course of EMA-reported Activities and Interactions*

|             | <b>Recumbent</b> |       | <b>Standing</b> |       | <b>Moving</b> |       | <b>Seated Home</b> |       |
|-------------|------------------|-------|-----------------|-------|---------------|-------|--------------------|-------|
|             | $X^2$            | $p$   | $X^2$           | $p$   | $X^2$         | $p$   | $X^2$              | $p$   |
| Omnibus     | 156.628          | <.001 | 133.329         | <.001 | 39.810        | <.001 | 322.725            | <.001 |
| Intercept   | 109.400          | q     | 213.866         | <.001 | 203.941       | <.001 | 3121.248           | <.001 |
| Week        | 1.148            | .563  | 4.230           | .121  | 1.745         | .418  | 3.929              | .269  |
| Day         | 21.316           | .002  | 8.930           | .178  | 22.423        | .001  | 30.104             | <.001 |
| Time of Day | 138.990          | <.001 | 122.681         | <.001 | 15.609        | .016  | 291.211            | <.001 |

|             | <b>Seated Away</b> |       | <b>Social Interactions</b> |       | <b>Non-Social Interactions</b> |       |
|-------------|--------------------|-------|----------------------------|-------|--------------------------------|-------|
|             | $X^2$              | $p$   | $X^2$                      | $p$   | $X^2$                          | $p$   |
| Omnibus     | 358.920            | <.001 | 141.138                    | <.001 | 151.956                        | <.001 |
| Intercept   | 496.955            | <.001 | 556.027                    | <.001 | 3.303                          | .069  |
| Week        | 4.454              | .216  | 1.407                      | .495  | 8.816                          | .012  |
| Day         | 113.260            | <.001 | 20.373                     | .002  | 46.099                         | <.001 |
| Time of Day | 250.560            | <.001 | 59.179                     | <.001 | 24.129                         | <.001 |

Table S3. *Significant Interactions of Treatment (oxytocin v. placebo) x Week for EMA-reported Activities, Mood/Affect, Interactions, and Interpersonal Interaction Appraisals*

| <b>Outcome</b>    | <b><math>X^2</math></b> | <b>df</b> | <b><i>p</i></b> |
|-------------------|-------------------------|-----------|-----------------|
| Moving Activities | 6.45                    | 2         | .040            |
| PA                | 6.15                    | 2         | .046            |
| NA                | 16.56                   | 2         | <.001           |
| Warmth/Trust      | 6.72                    | 2         | .035            |
| Competence        | 9.85                    | 2         | .007            |

*Note.* PA = positive affect; NA = negative affect. The table above provides statistics for significant interactions of treatment\*week. Treatment\*week interactions for the remaining outcomes (social interactions, non-social interactions, standing activities, recumbent activities, and total seated activities) were not significant ( $X^2(2) < 3.42$ , all  $p > .07$ ).
